# Supplementary material for: Efficacy of Teduglutide for Parenteral Support Reduction in Patients with Short Bowel Syndrome: A Systematic Review and Meta-Analysis
Source: MDPI journal article supplement (doi:10.3390/nu14040796), 2022-02-14
Supplement: s1 [file s1]

## Supplementary tables and figures

**Table S1.** Risk of bias assessment of the RCTs according to RoB 2 tool.

| <b>Study</b>              | <b>Bias arising from the randomisation process</b> | <b>Bias due to deviations from intended interventions</b> | <b>Bias due to missing outcome data</b> | <b>Bias in measurement of the outcome</b> | <b>Bias in selection of the reported result</b> | <b>Overall risk of bias</b> |
|---------------------------|----------------------------------------------------|-----------------------------------------------------------|-----------------------------------------|-------------------------------------------|-------------------------------------------------|-----------------------------|
| Jeppesen et al, 2011 [27] | Low                                                | Low                                                       | Low                                     | Low                                       | Low                                             | Low                         |
| Jeppesen et al, 2012 [28] | Low                                                | Low                                                       | Low                                     | Low                                       | Low                                             | Low                         |

Abbreviations: RCT, randomized controlled trial.

**Table S2.** Risk of bias assessment of the observational studies according to ROBINS-I tool.

| <b>Study</b>              | <b>Bias due to confounding</b> | <b>Bias in selection of participants into the study</b> | <b>Bias in measurement classification of interventions</b> | <b>Bias due to deviations from intended interventions</b> | <b>Bias due to missing data</b> | <b>Bias in measurement of outcomes</b> | <b>Bias in selection of the reported result</b> | <b>Overall bias</b> |
|---------------------------|--------------------------------|---------------------------------------------------------|------------------------------------------------------------|-----------------------------------------------------------|---------------------------------|----------------------------------------|-------------------------------------------------|---------------------|
| Joly et al, 2019 [41]     | Low                            | Low                                                     | Low                                                        | Low                                                       | Low                             | Low                                    | Low                                             | Low                 |
| Martin et al, 2020 [42]   | Moderate                       | Moderate                                                | Low                                                        | Low                                                       | Low                             | Low                                    | Low                                             | Moderate            |
| O’Keefe et al, 2013 [43]  | Low                            | Low                                                     | Low                                                        | Low                                                       | Low                             | Low                                    | Low                                             | Low                 |
| Pevny et al, 2018 [44]    | Low                            | Low                                                     | Low                                                        | Low                                                       | Low                             | Low                                    | Low                                             | Low                 |
| Puello et al, 2020 [45]   | Low                            | Low                                                     | Low                                                        | Low                                                       | Moderate                        | Low                                    | Low                                             | Moderate            |
| Schoeler et al, 2018 [46] | Moderate                       | Moderate                                                | Moderate                                                   | Low                                                       | Low                             | Low                                    | Low                                             | Moderate            |
| Schwartz et al, 2016 [47] | Moderate                       | Moderate                                                | Low                                                        | Low                                                       | Low                             | Low                                    | Low                                             | Moderate            |
| Solar et al, 2020 [48]    | Moderate                       | Moderate                                                | Low                                                        | Low                                                       | Low                             | Low                                    | Low                                             | Moderate            |

**Figure S1.** Forest plot for the evaluation of the difference in response rate between the teduglutide and the placebo group in the available RCTs.

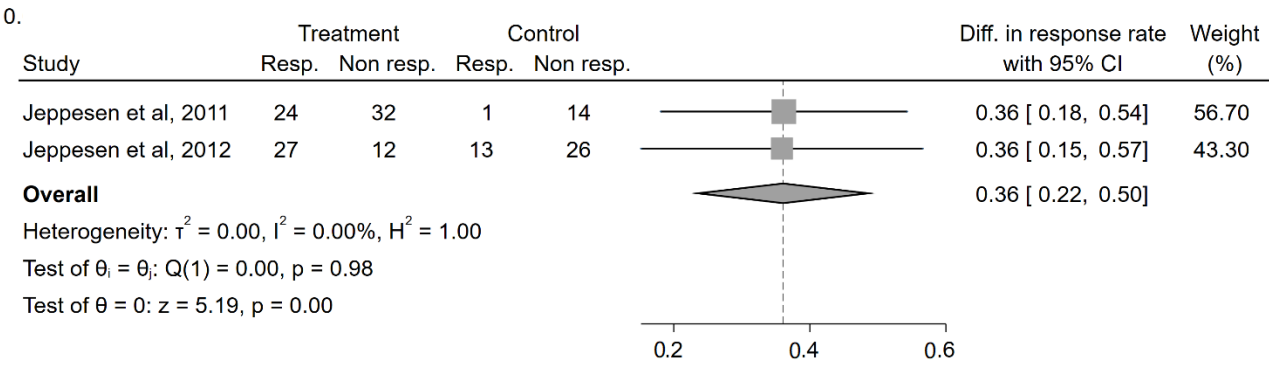

Abbreviations: CI, confidence interval; Diff., difference; RCT, randomized controlled trial; Resp., responders; Non resp., non responders.

**Figure S2.** Subgroup analysis for the comparison of the response rate at 6 months in observational studies and RCTs.

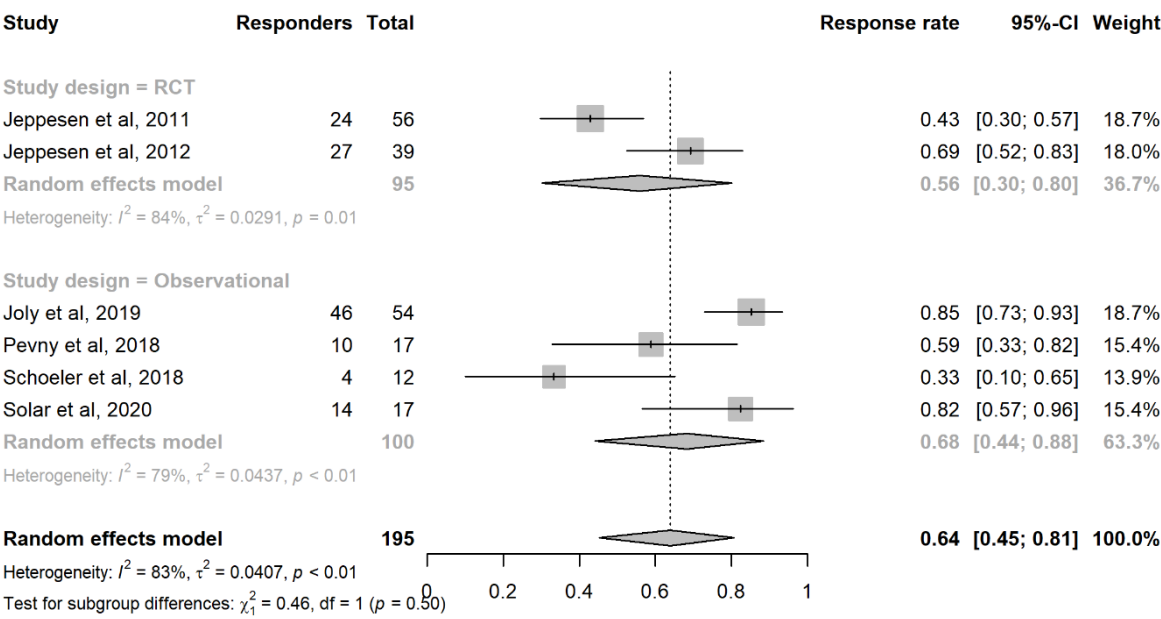

Abbreviations: CI, confidence interval; RCT, randomized controlled trial.

**Figure S3.** Forest plot for the evaluation of the difference in response rate between the teduglutide and the placebo group in the available RCTs, after the exclusion of the patients treated with a teduglutide dosing schedule of 0.1 mg/kg/day.

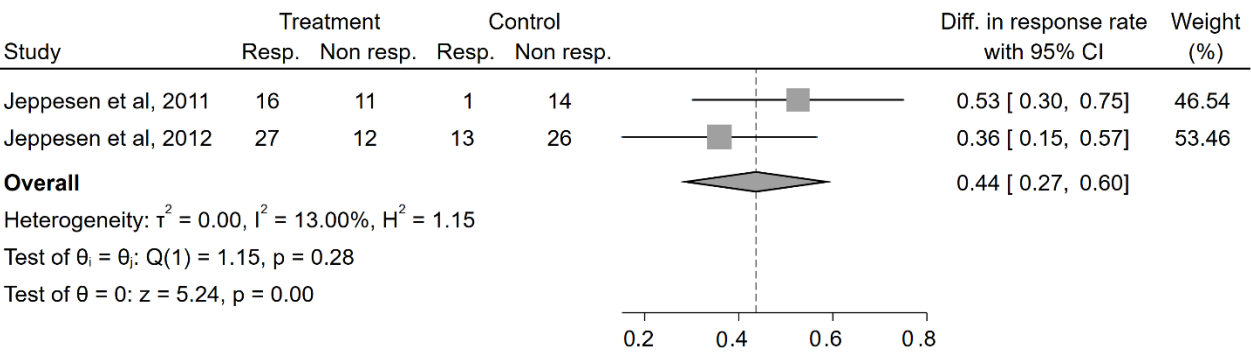

Abbreviations: CI, confidence interval; Diff., difference; RCT, randomized controlled trial; Resp., responders; Non resp., non responders.

**Figure S4.** Forest plot for the estimation of response rate at 6 months, 1 year, and  $\geq 2$  years, after the exclusion of the patients treated with a teduglutide dosing schedule of 0.1 mg/kg/day.

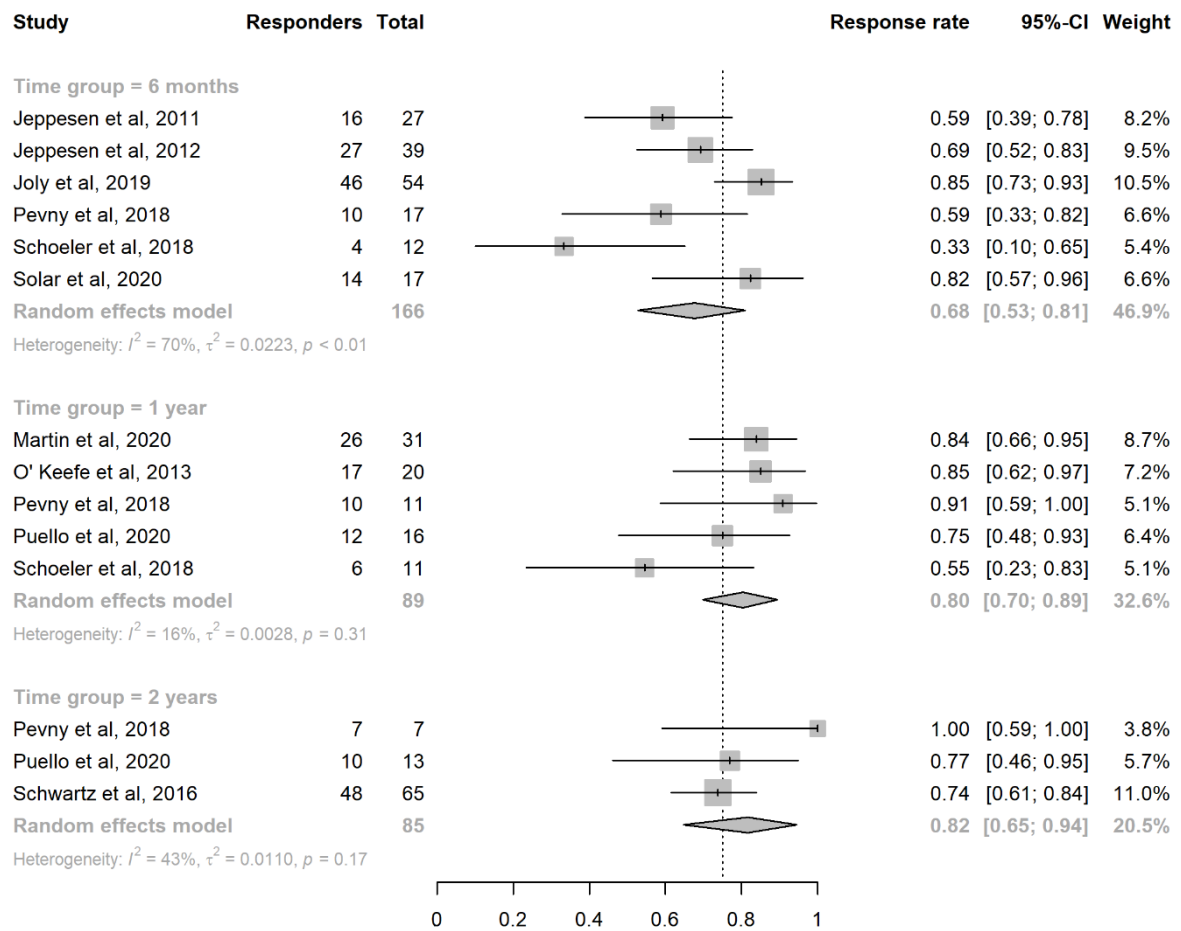

Abbreviations: CI, confidence interval.

**Figure S5.** Subgroup analysis for the comparison of the response rate at 6 months in observational studies and RCTs, after the exclusion of the patients treated with a teduglutide dosing schedule of 0.1 mg/kg/day.

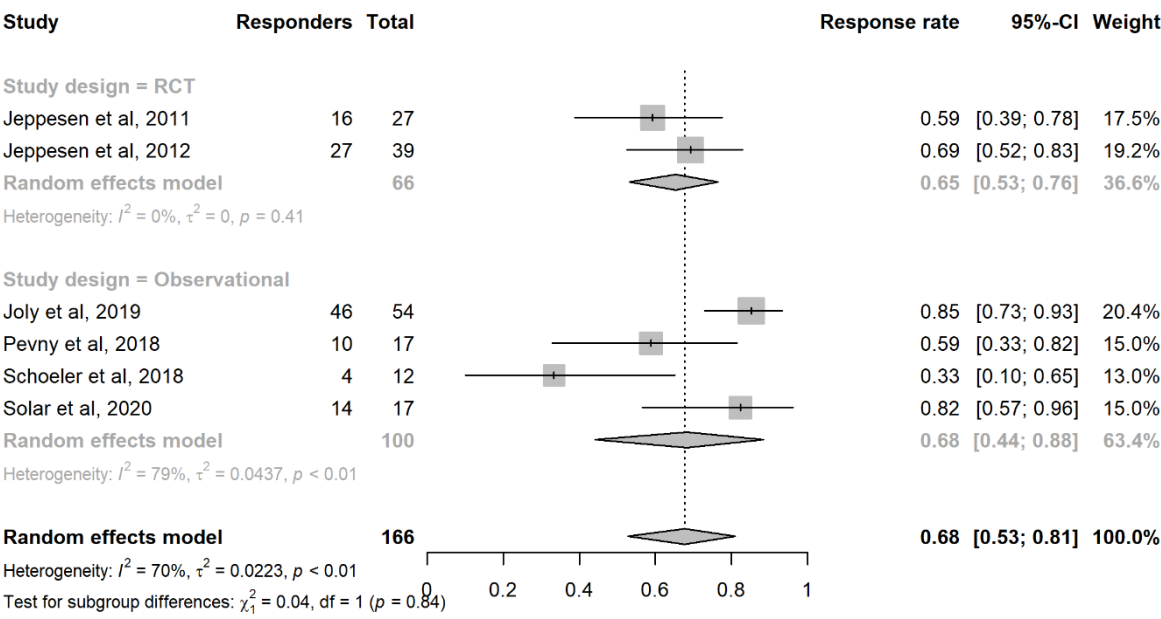

Abbreviations: CI, confidence interval; RCT, randomized controlled trial.

**Figure S6.** Forest plot for the estimation of the weaning rate at 6 months, 1 year, and  $\geq 2$  years, after the exclusion of the patients treated with a teduglutide dosing schedule of 0.1 mg/kg/day.

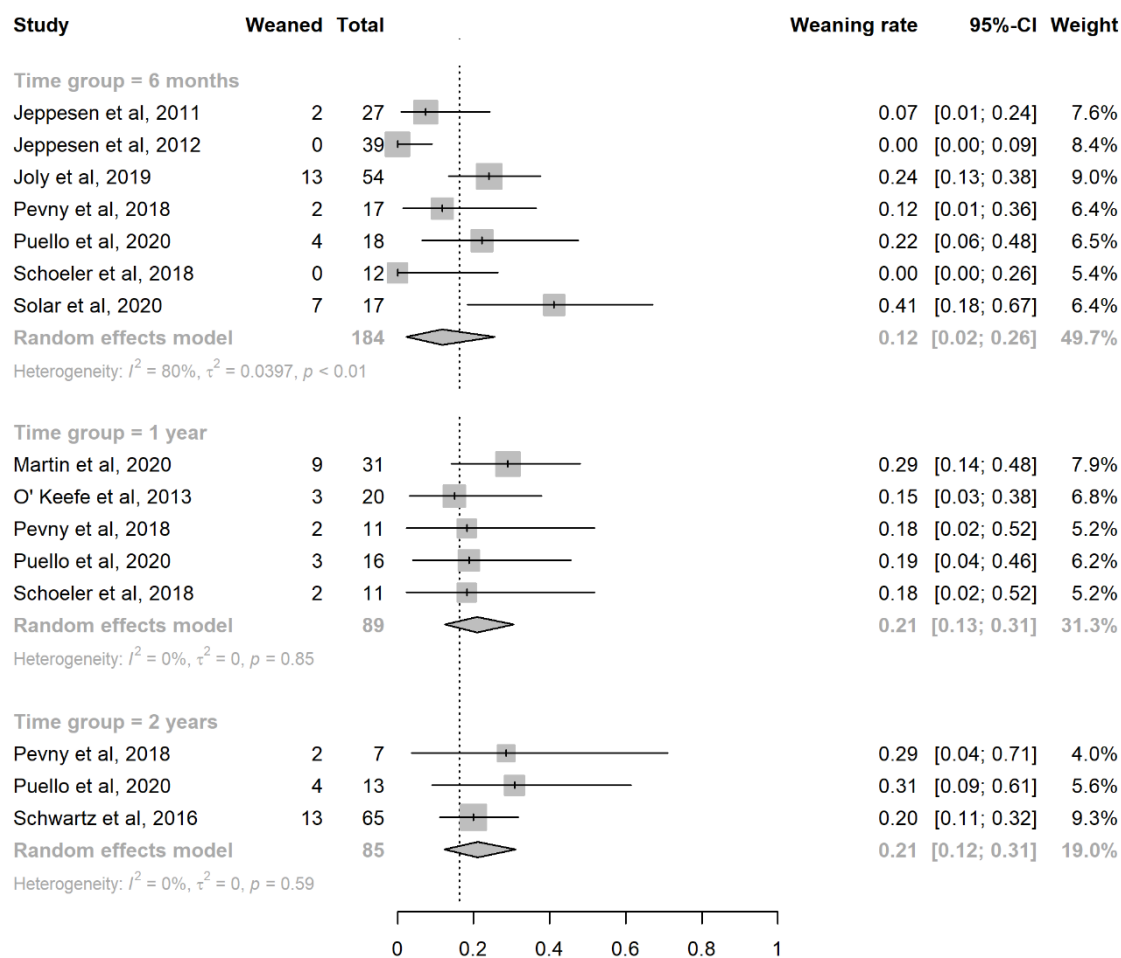

Abbreviations: CI, confidence interval.
